# Supplementary material for: Evolution of Mn–Bi2O3 from the Mn-doped Bi3O4Br electro(pre)catalyst during the oxygen evolution reaction
Source: Royal Society of Chemistry journal article supplement (doi:10.1039/d4dt00633j), 2024-01-01
Supplement: d4dt00633j1.pdf [file d4dt00633j1.pdf]

*Electronic Supplementary Information (ESI)*

*for*

**Evolution of Mn-Bi<sub>2</sub>O<sub>3</sub> from the Mn-doped Bi<sub>3</sub>O<sub>4</sub>Br electro(pre)catalyst during the oxygen evolution reaction**

Avinava Kundu<sup>#†</sup>, Ashish Kumar Dhillon<sup>#†</sup>, Ruchi Singh<sup>†</sup>, Sanmitra Barman<sup>\*‡</sup>, Soumik Siddhanta<sup>\*†</sup> and Biswarup Chakraborty<sup>\*†</sup>

<sup>†</sup>Department of Chemistry, Indian Institute of Technology Delhi, Hauz Khas, 110016, New Delhi, India

<sup>‡</sup>Center for Advanced Materials and Devices (CAMD), BML Munjal University, Haryana, India

<sup>#</sup> Authors contributed equally

Department of Chemistry, Indian Institute of Technology Delhi, Hauz Khas, 110016, New Delhi, India

\*[sanmitra.barman@bmu.edu.in](mailto:sanmitra.barman@bmu.edu.in), \*[soumik@chemistry.iitd.ac.in](mailto:soumik@chemistry.iitd.ac.in) and \*[cbiswarup@chemistry.iitd.ac.in](mailto:cbiswarup@chemistry.iitd.ac.in)

---

## Table of Contents

| <b>Contents</b>                                                                              | <b>Page number</b> |
|----------------------------------------------------------------------------------------------|--------------------|
| <b>1. Characterization of the Mn-doped and Pristine Bi<sub>3</sub>O<sub>4</sub>Br Sample</b> | S3-S16             |
| <b>2. References</b>                                                                         | S17                |

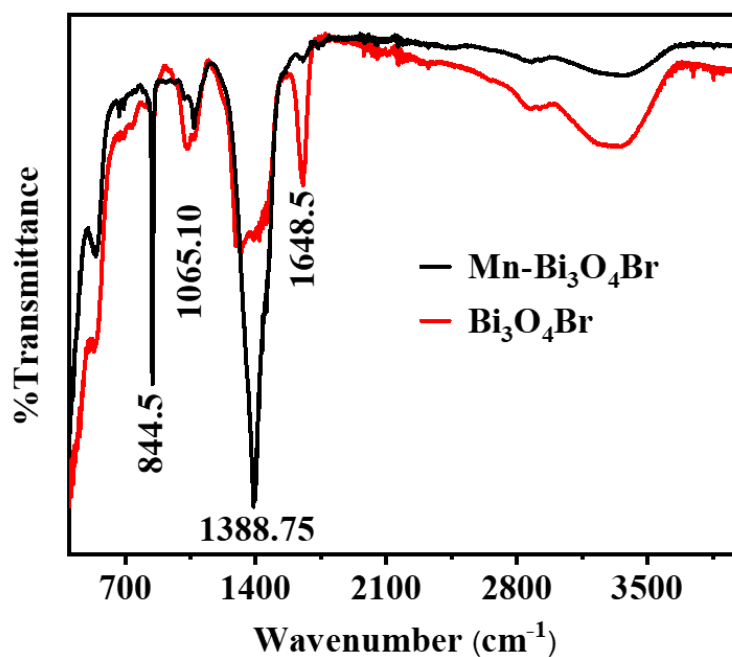

**Figure S1:** FTIR spectra recorded for Mn-Bi<sub>3</sub>O<sub>4</sub>Br and Bi<sub>3</sub>O<sub>4</sub>Br powder sample.

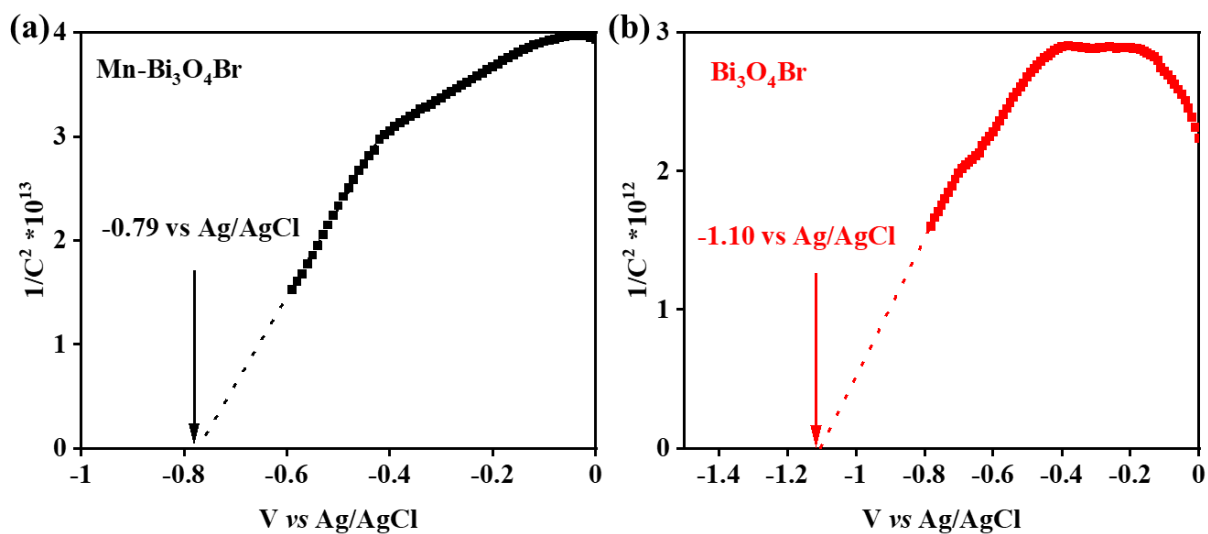

**Figure S2:** Mott-Schottky analysis of the (a) Mn-Bi<sub>3</sub>O<sub>4</sub>Br and (b) Bi<sub>3</sub>O<sub>4</sub>Br powder samples.

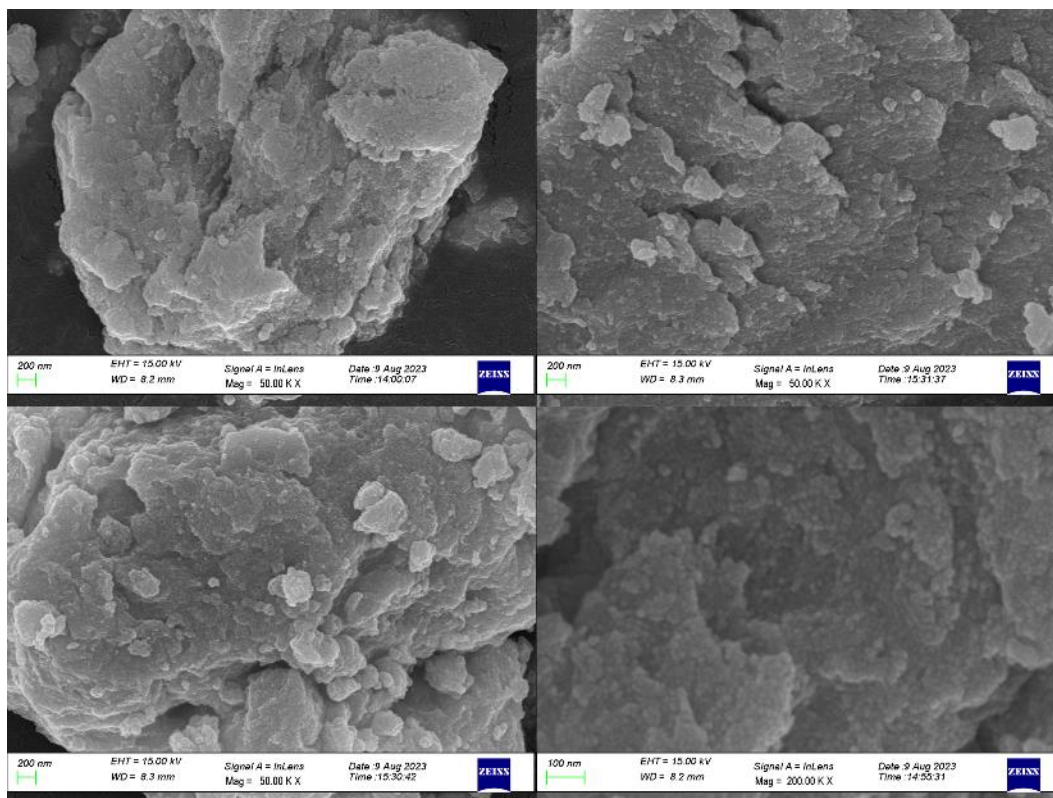

**Figure S3:** FESEM images of the Mn-Bi<sub>3</sub>O<sub>4</sub>Br collected at different magnification confirming the layered type structure.

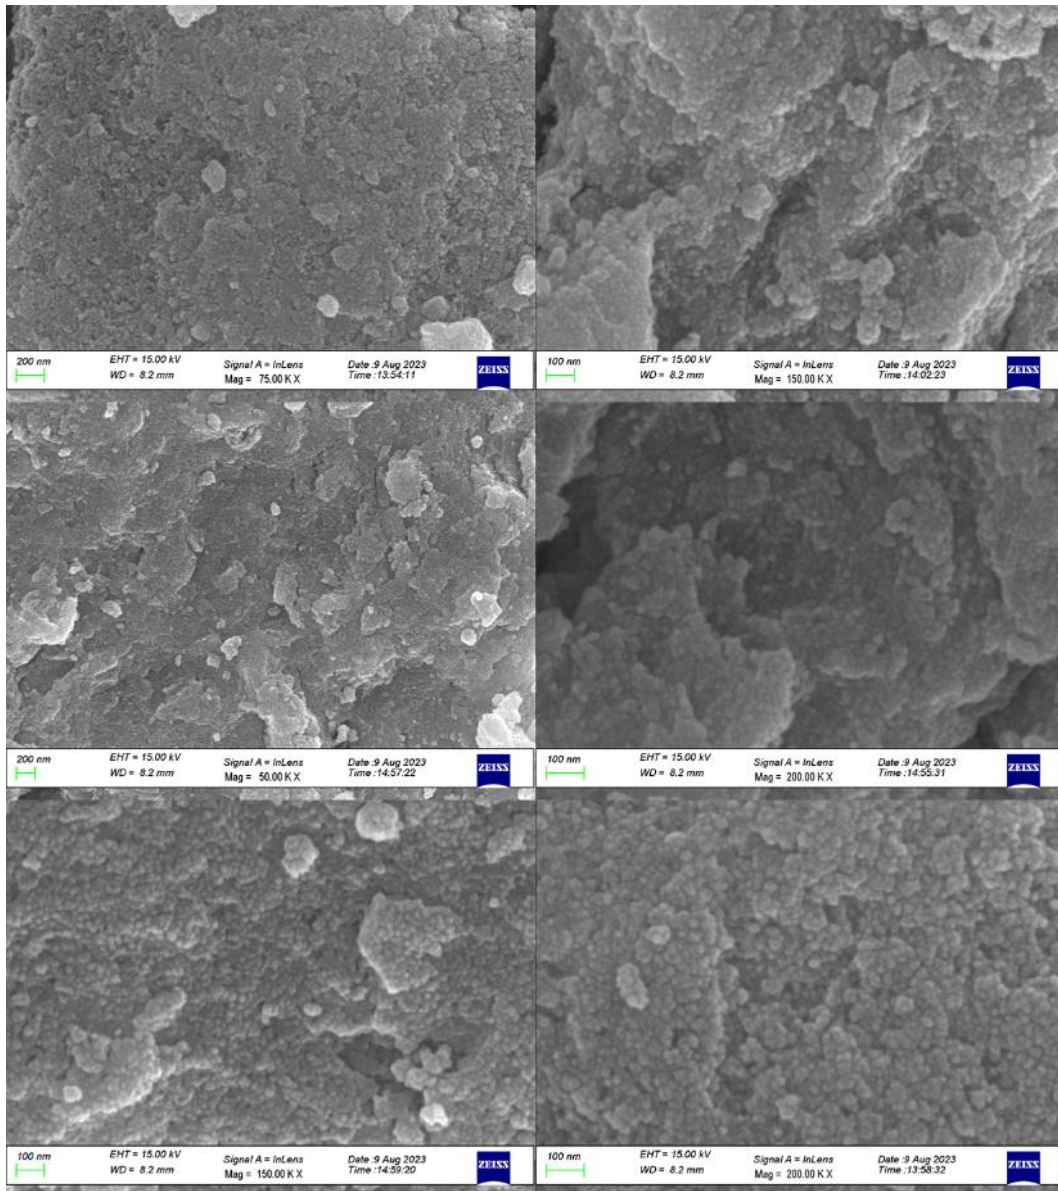

**Figure S4:** FESEM images of pristine Bi<sub>3</sub>O<sub>4</sub>Br powder samples in different magnifications and different places of bulk materials.

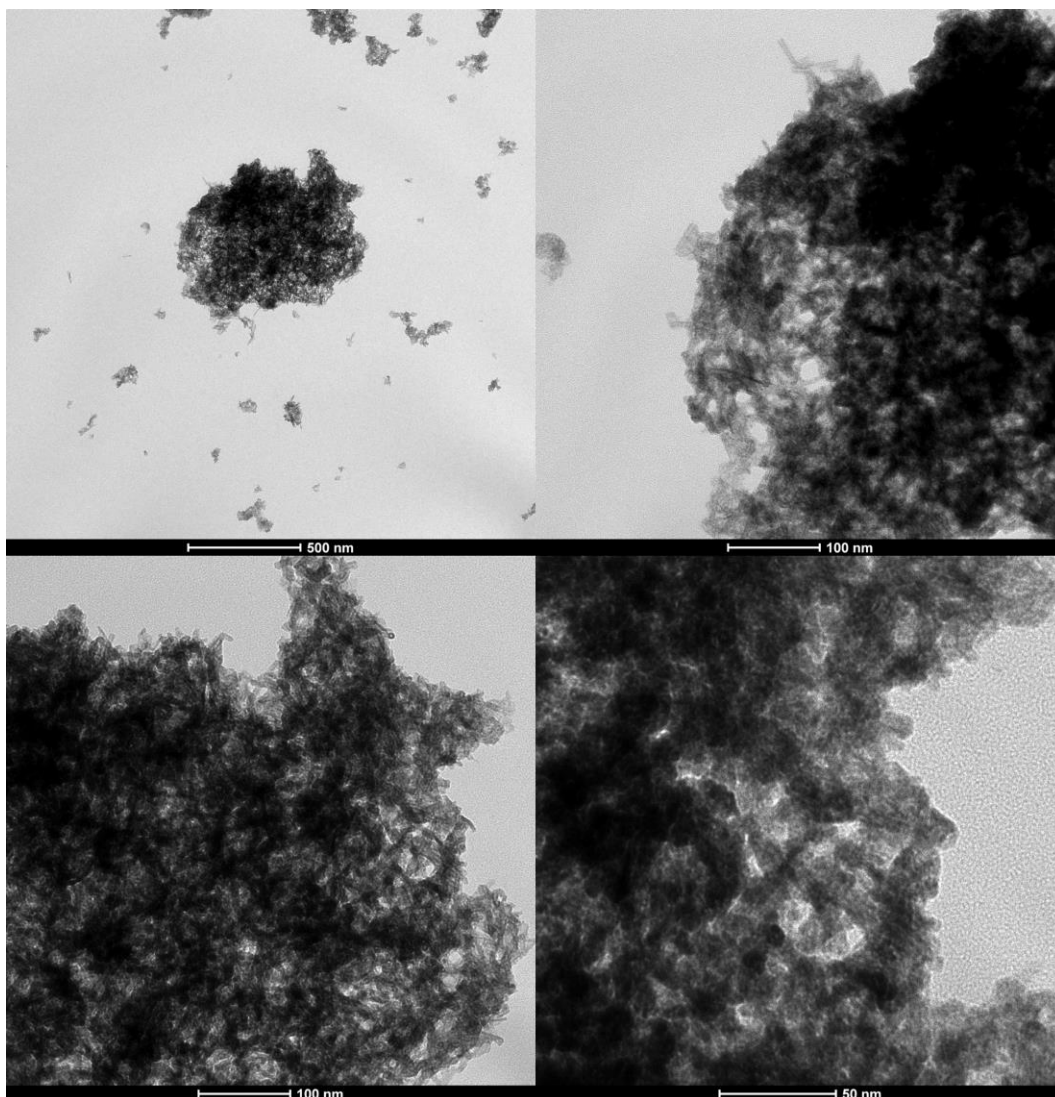

**Figure S5:** TEM images of pristine Bi<sub>3</sub>O<sub>4</sub>Br powder samples with different magnifications.

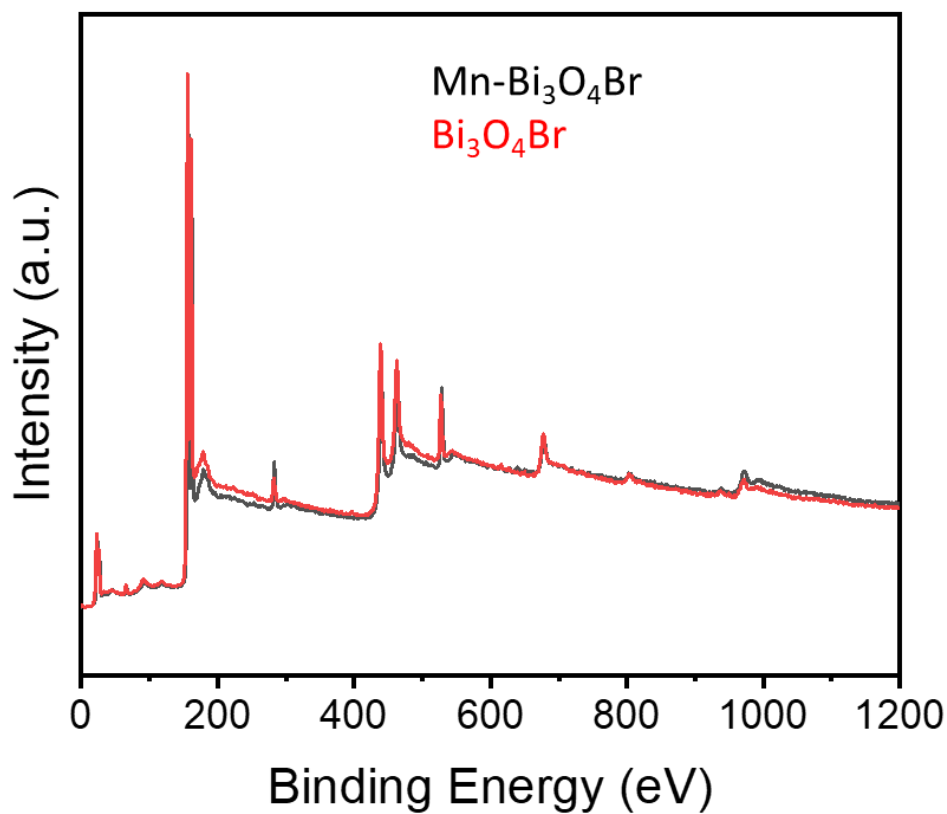

**Figure S6:** XPS survey spectra recorded for Mn-doped Bi<sub>3</sub>O<sub>4</sub>Br and pristine Bi<sub>3</sub>O<sub>4</sub>Br powder sample.

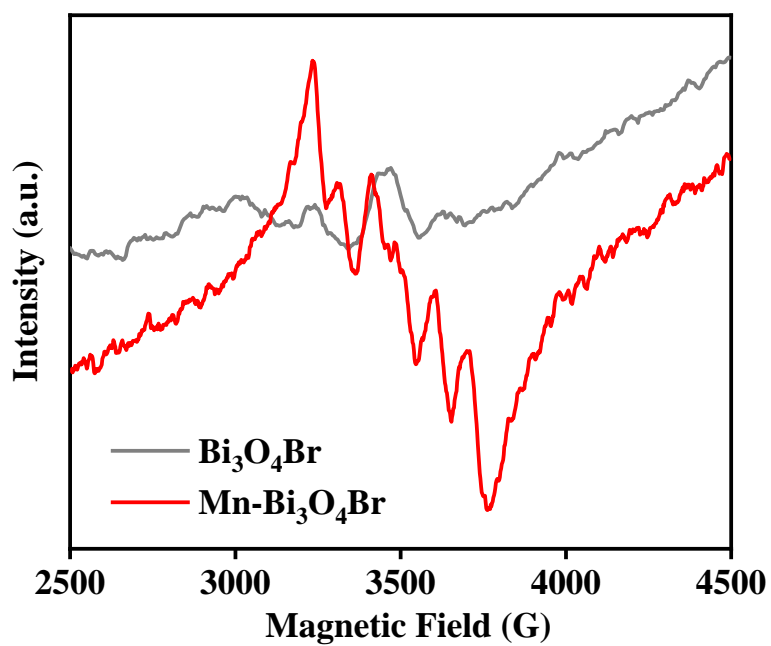

**Figure S7:** X-band (9.4 GHz) EPR spectra of Mn-Bi<sub>3</sub>O<sub>4</sub>Br (red) and Bi<sub>3</sub>O<sub>4</sub>Br (grey), recorded at room temperature.

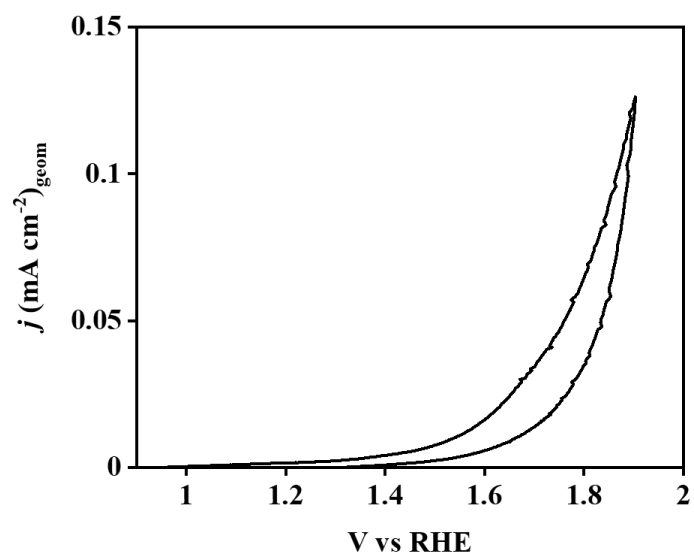

**Figure S8:** CV scan recorded with  $\text{Bi}_3\text{O}_4\text{Br}$  on GC electrode within a potential window of 0.9 to 1.9 V vs RHE. (Scan starts and ends: 0.9 V, potential switch: 1.9 V, scan rate  $5 \text{ mV s}^{-1}$ , 1 M KOH as electrolyte, without iR-correction)



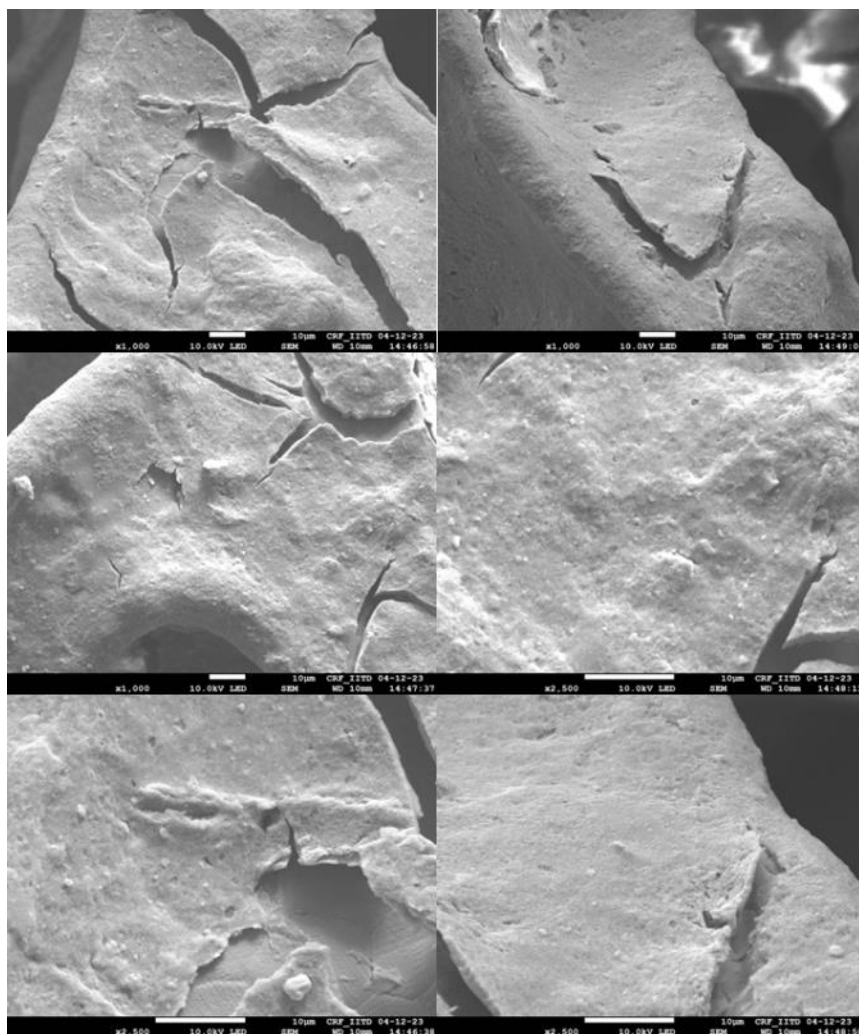

**Figure S9:** FESEM images (at different magnifications) of the Mn-Bi<sub>3</sub>O<sub>4</sub>Br sample drop-casted on the nickel foam.

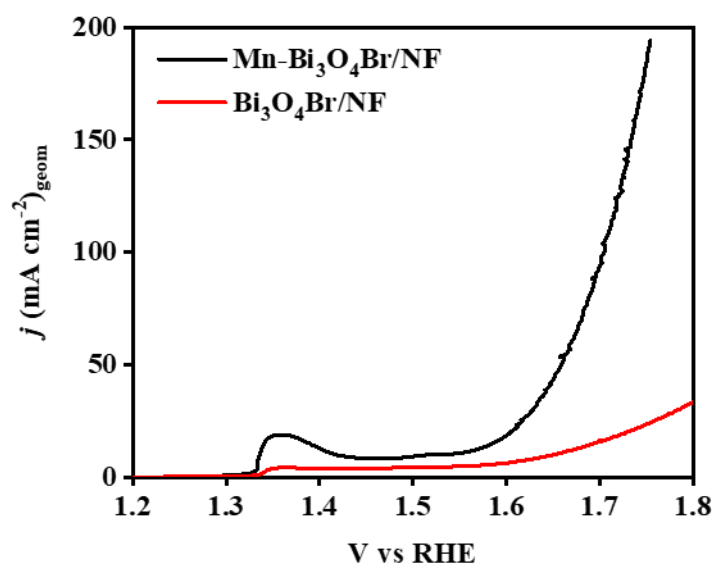

**Figure S10:** LSV study recorded in between 1.2 to 1.8 V vs RHE for Mn-Bi<sub>3</sub>O<sub>4</sub>Br and Bi<sub>3</sub>O<sub>4</sub>Br/NF using graphite rod as a counter electrode.

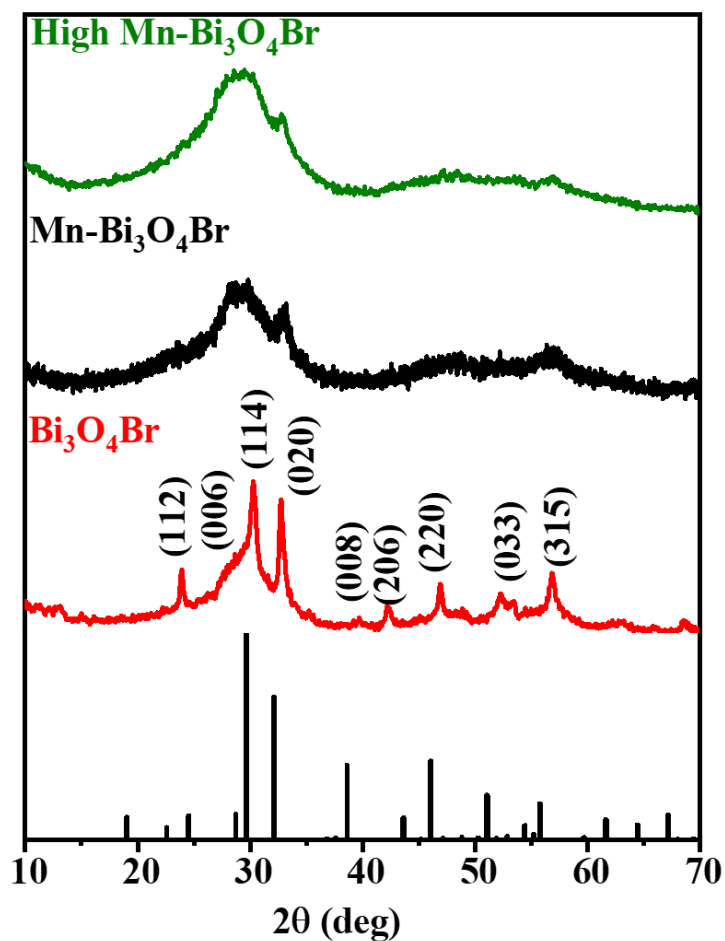

**Figure S11:** Powder X-ray diffraction pattern of the as-synthesised Bi<sub>3</sub>O<sub>4</sub>Br (red), Mn-Bi<sub>3</sub>O<sub>4</sub>Br (black) and a different Mn-containing Bi<sub>3</sub>O<sub>4</sub>Br labelled as high Mn- Bi<sub>3</sub>O<sub>4</sub>Br (green). Black bars at the bottom ICDD data (84-0793) of Bi<sub>3</sub>O<sub>4</sub>Br.

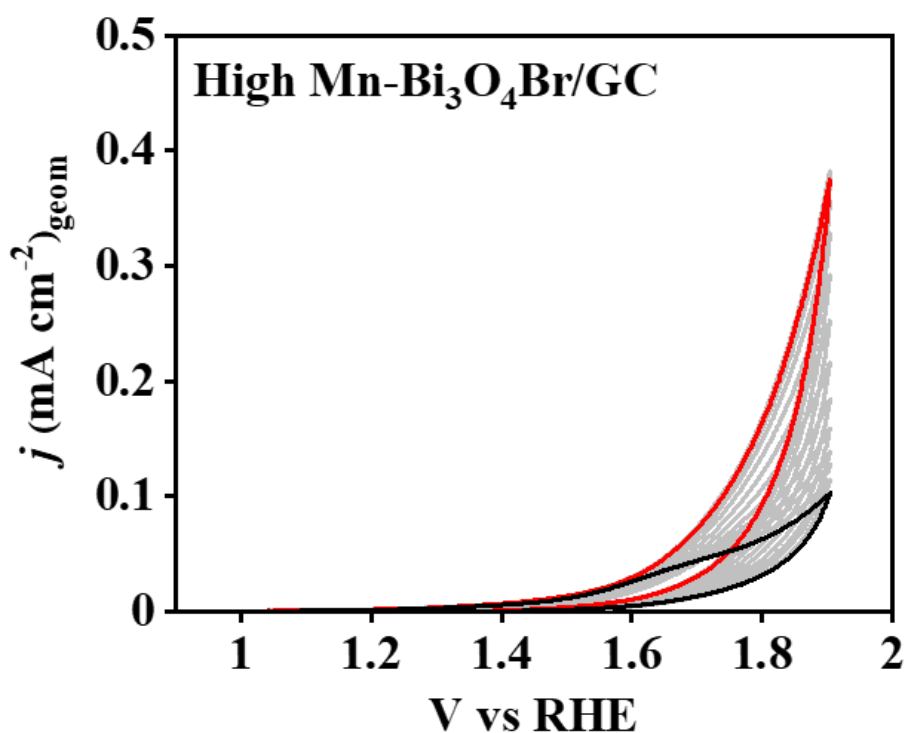

**Figure S12:** CV cycles of the different amount of Mn-doped in  $\text{Bi}_3\text{O}_4\text{Br}$  sample (labelled as high Mn- $\text{Bi}_3\text{O}_4\text{Br}$ ) on GC electrode. (Scan starts and ends: 0.9 V, potential switch: 1.9 V, scan rate  $5 \text{ mV s}^{-1}$ , 1 M KOH as electrolyte)

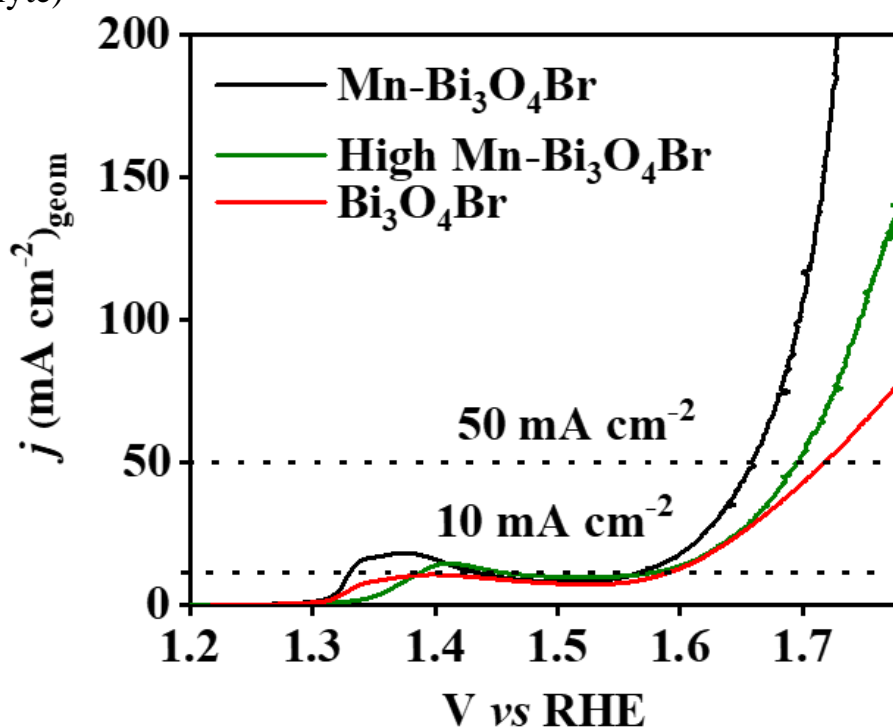

**Figure S13:** Comparison of polarograms obtained from the linear sweep voltammetry (LSV) recorded in between 1.2 to 1.8 V vs RHE for Mn- $\text{Bi}_3\text{O}_4\text{Br}/\text{NF}$ , High Mn- $\text{Bi}_3\text{O}_4\text{Br}/\text{NF}$  and  $\text{Bi}_3\text{O}_4\text{Br}/\text{NF}$ .

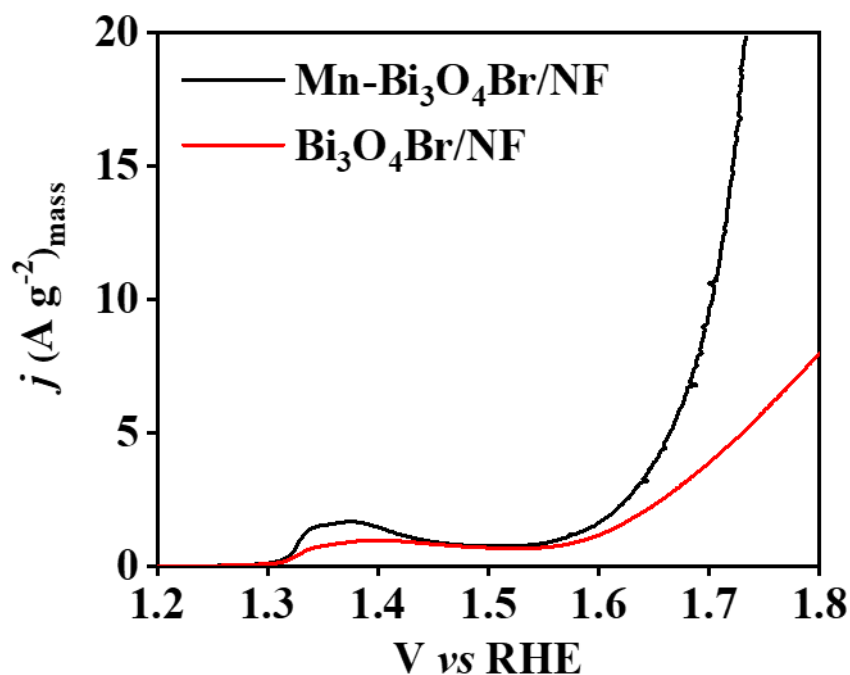

**Figure S14:** Mass activity of the Mn-Bi<sub>3</sub>O<sub>4</sub>Br/NF and Bi<sub>3</sub>O<sub>4</sub>Br/NF electrode.

**Table S1.** Performance of 7% Mn doped Bi<sub>3</sub>O<sub>4</sub>Br and comparison of different pure Mn-based OER electrocatalysts.

| Catalyst                                                              | Electrolyte | Overpotential | Reference |
|-----------------------------------------------------------------------|-------------|---------------|-----------|
| Mn-Bi <sub>3</sub> O <sub>4</sub> Br                                  | 1 M KOH     | 337           | This Work |
| Metal-doped MnO <sub>2</sub>                                          | 1 M KOH     | 390           | 1         |
| $\alpha$ -MnO <sub>2</sub>                                            | 0.1 M KOH   | 508           | 2         |
| MnO <sub>x</sub> NWs                                                  | 0.1 M KOH   | 519           | 3         |
| Ni-MnO <sub>2</sub>                                                   | 1 M KOH     | 330           | 4         |
| $\alpha$ -MnS                                                         | 1 M KOH     | 292           | 5         |
| MnO <sub>2</sub> /CQD                                                 | 1 M KOH     | 343           | 6         |
| MnSe/CC                                                               | 1 M KOH     | 310           | 7         |
| MnSe@MWCNT/CC                                                         | 1 M KOH     | 290           | 7         |
| MnO <sub>x</sub> /OCNT                                                | 0.1 M KOH   | 520           | 8         |
| MnGa <sub>4</sub>                                                     | 1 M KOH     | 291           | 9         |
| LiMn(H <sub>2</sub> O) <sub>2</sub> [BP <sub>2</sub> O <sub>8</sub> ] | 1 M KOH     | 228           | 10        |

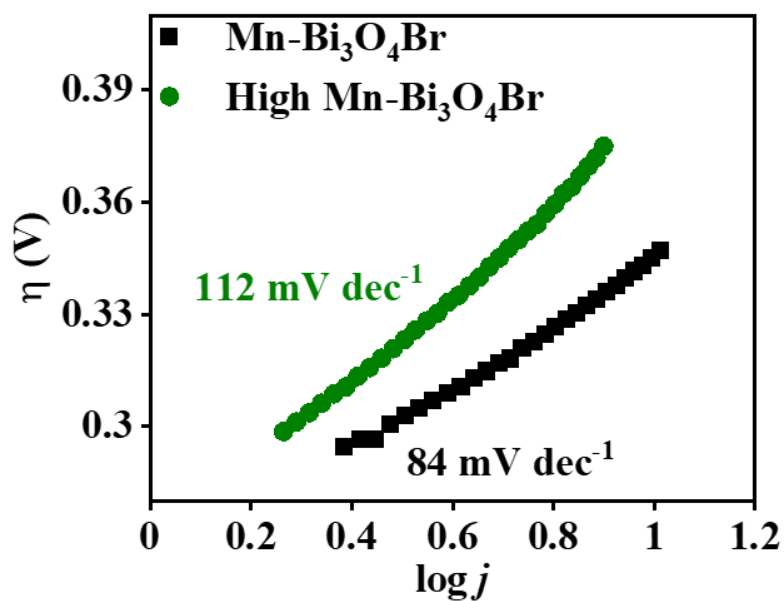

**Figure S15:** Tafel slope analysis of the Mn-Bi<sub>3</sub>O<sub>4</sub>Br/NF and High Mn-Bi<sub>3</sub>O<sub>4</sub>Br/NF electrode obtained from the LSV curves.

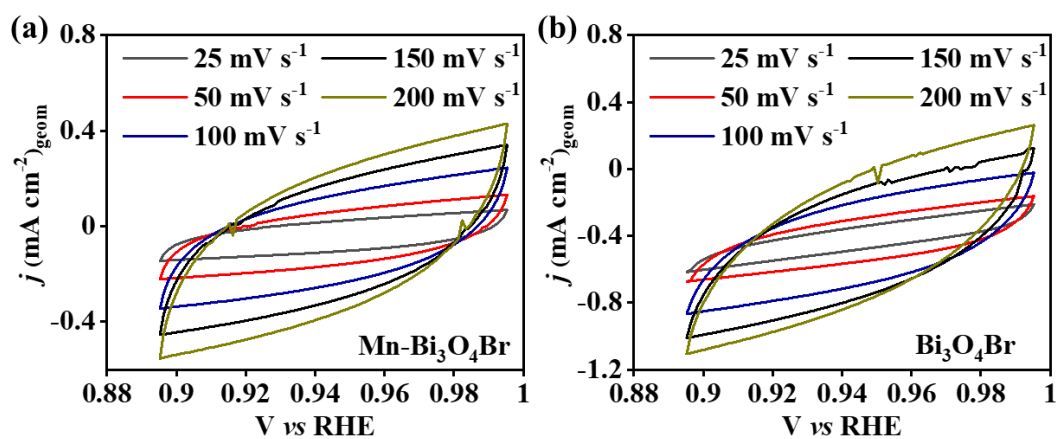

**Figure S16:** CV cycles recorded in between 0.89 V and 0.99 V vs RHE (in the capacitive region) for (a) Mn-Bi<sub>3</sub>O<sub>4</sub>Br/NF and (b) Bi<sub>3</sub>O<sub>4</sub>Br/NF. The scan rate was varied from 25 mV s<sup>-1</sup> to 200 mV s<sup>-1</sup>.

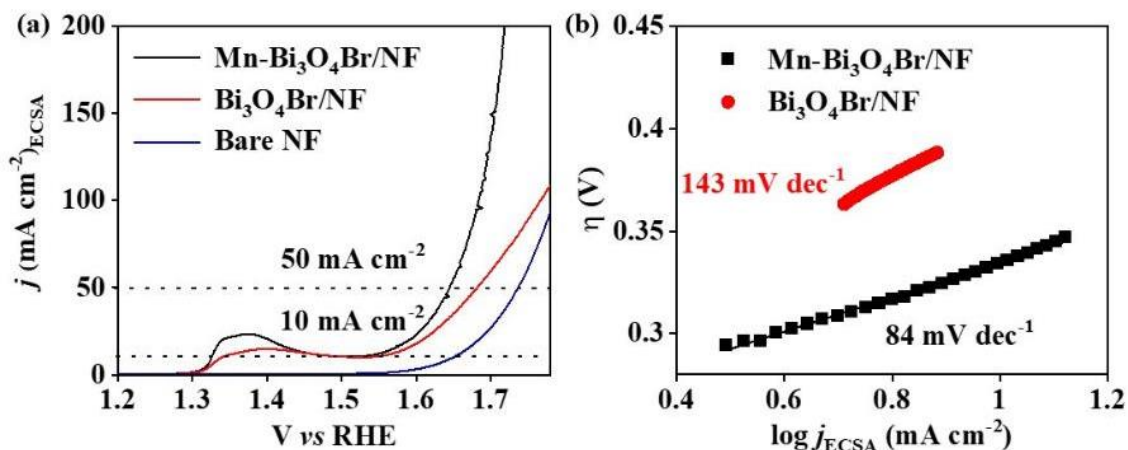

**Figure S17:** (a) ECSA normalized polarization curves, and (b) corresponding Tafel plot for Mn-Bi<sub>3</sub>O<sub>4</sub>Br, Bi<sub>3</sub>O<sub>4</sub>Br, and bare NF.

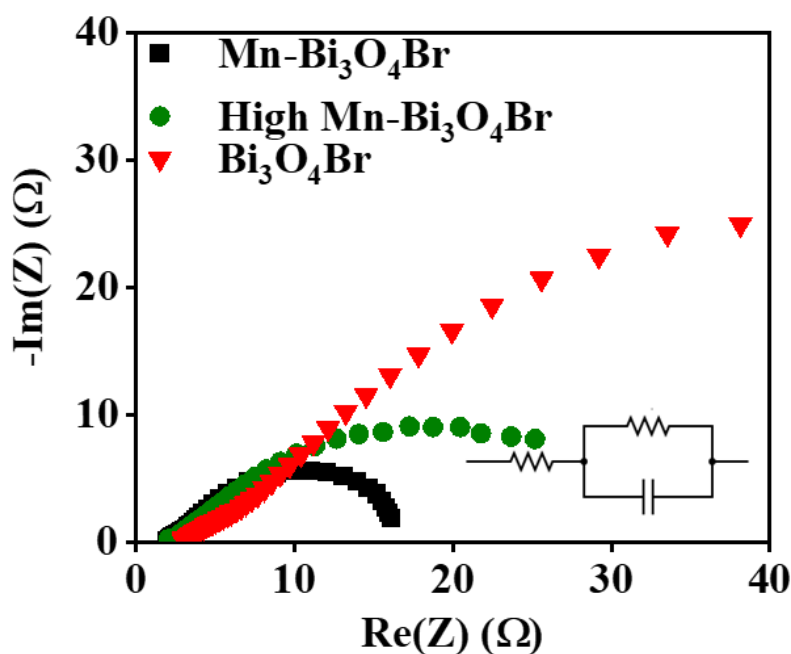

**Figure S18:** Nyquist plot from the data obtained from the EIS recorded in between 100 kHz and 0.01 Hz frequency range with Mn-Bi<sub>3</sub>O<sub>4</sub>Br, High Mn-Bi<sub>3</sub>O<sub>4</sub>Br and Bi<sub>3</sub>O<sub>4</sub>Br.

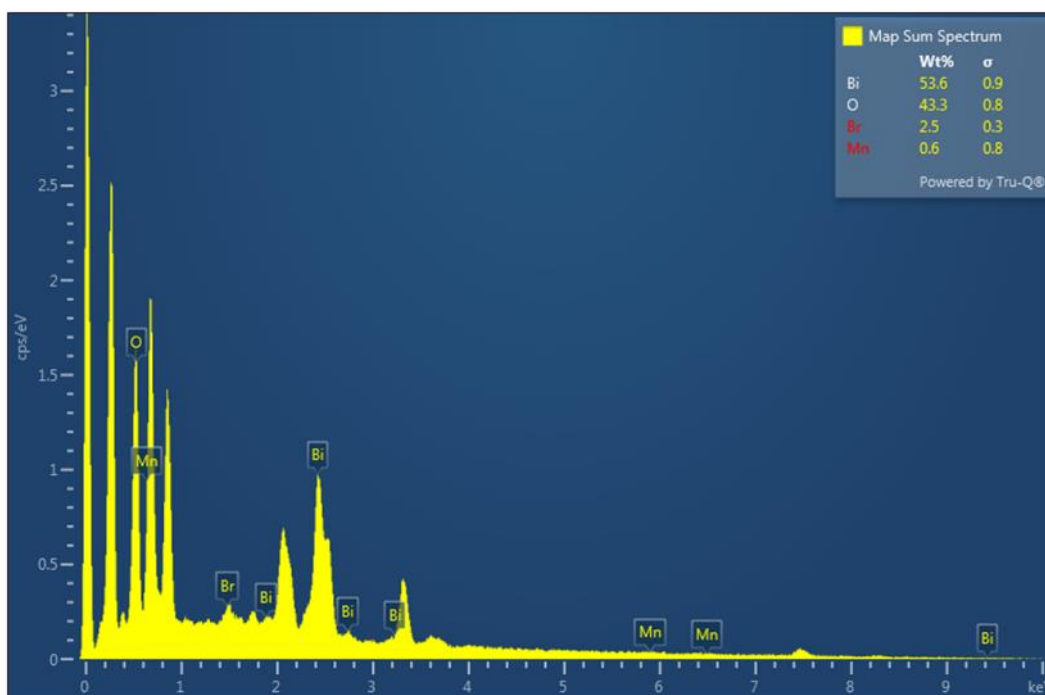

**Figure S19:** EDX spectra of the Mn-Bi<sub>3</sub>O<sub>4</sub>Br/NF electrode after post-OER CA at 1.6 V for over 12 h. .

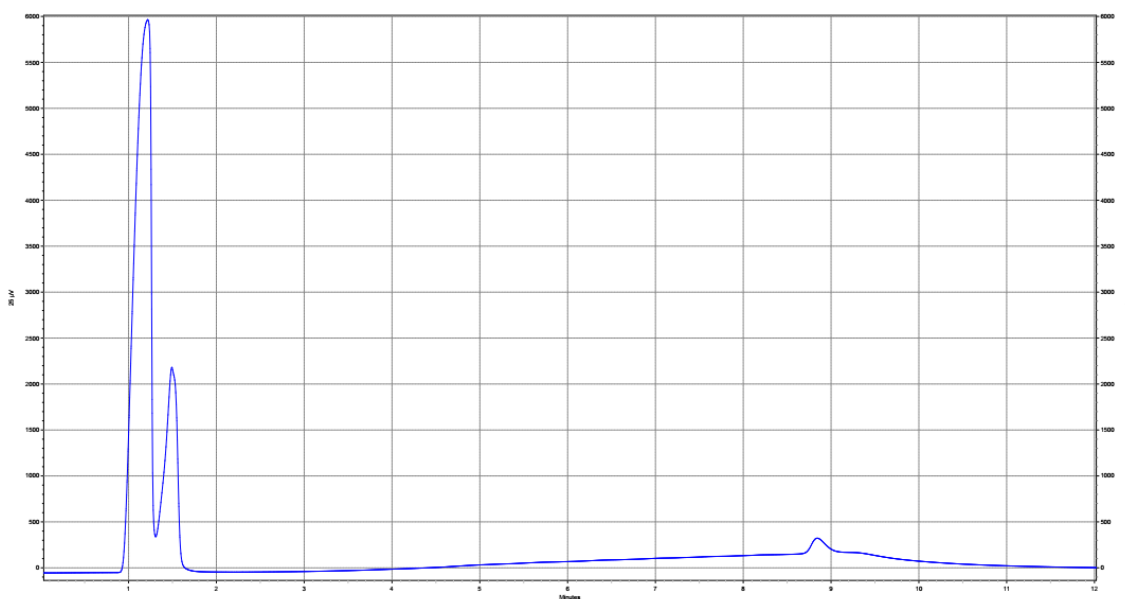

**Figure S20:** GC chromatogram of the evolved H<sub>2</sub> and O<sub>2</sub> from the full cell electrolyser developed with Mn-Bi<sub>3</sub>O<sub>4</sub>Br(+)/(-)GR after electrolysis at 2.5 V. The peak at retention time 1.1 and 1.3 is of H<sub>2</sub> and N<sub>2</sub>, while the O<sub>2</sub> peak appeared at retention time 8.8.

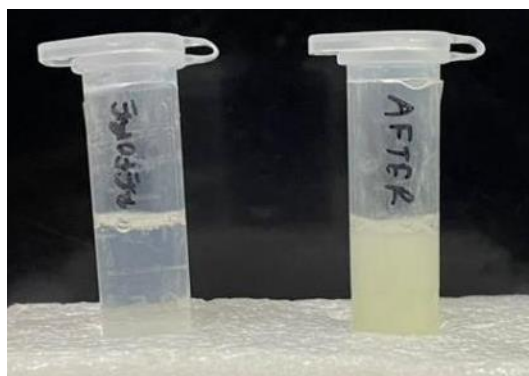

**Figure S21:** A wet analysis of the electrolyte after 12 h OER CA at 1.6 V CA with Mn-Bi<sub>3</sub>O<sub>4</sub>Br. Left: pre-OER CA electrolyte and right: pale yellow AgBr precipitate (right) obtained by addition of AgNO<sub>3</sub> solution (after acid treatment).



## References

- (1) Ye, Z.; Li, T.; Ma, G.; Dong, Y.; Zhou, X. Metal-Ion (Fe, V, Co, and Ni)-Doped MnO<sub>2</sub> Ultrathin Nanosheets Supported on Carbon Fiber Paper for the Oxygen Evolution Reaction. *Adv. Funct. Mater.* **2017**, *27* (44), 1704083.
- (2) Zhuang, Q.; Ma, N.; Yin, Z.; Yang, X.; Yin, Z.; Gao, J.; Xu, Y.; Gao, Z.; Wang, H.; Kang, J.; Xiao, D.; Li, J.; Li, X.; Ma, D. Rich Surface Oxygen Vacancies of MnO<sub>2</sub> for Enhancing Electrocatalytic Oxygen Reduction and Oxygen Evolution Reactions. *Adv. Energy Sustainability Res.* **2021**, *2* (8), 2100030.
- (3) Luo, X.-F.; Wang, J.; Liang, Z.-S.; Chen, S.-Z.; Liu, Z.-L.; Xu, C.-W. Manganese oxide with different morphology as efficient electrocatalyst for oxygen evolution reaction. *Int. J. Hydrog. Energy* **2017**, *42* (10), 7151-7157.
- (4) Yang, Y.; Su, X.; Zhang, L.; Kerns, P.; Achola, L.; Hayes, V.; Quardokus, R.; Suib, S. L.; He, J. Intercalating MnO<sub>2</sub> Nanosheets With Transition Metal Cations to Enhance Oxygen Evolution. *ChemCatChem* **2019**, *11* (6), 1689-1700.
- (5) Pujari, R. B.; Gund, G. S.; Patil, S. J.; Park, H. S.; Lee, D.-W. Anion-exchange phase control of manganese sulfide for oxygen evolution reaction. *J. Mater. Chem. A* **2020**, *8* (7), 3901-3909.
- (6) Rauti, R.; Musto, M.; Bosi, S.; Prato, M.; Ballerini, L. Properties and behavior of carbon nanomaterials when interfacing neuronal cells: How far have we come? *Carbon* **2019**, *143*, 430-446.
- (7) Singh, H.; Marley-Hines, M.; Chakravarty, S.; Nath, M. Multi-walled carbon nanotube supported manganese selenide as a highly active bifunctional OER and ORR electrocatalyst. *J. Mater. Chem. A* **2022**, *10* (12), 6772-6784.
- (8) Antoni, H.; Xia, W.; Masa, J.; Schuhmann, W.; Muhler, M. Tuning the oxidation state of manganese oxide nanoparticles on oxygen- and nitrogen-functionalized carbon nanotubes for the electrocatalytic oxygen evolution reaction. *Phys. Chem. Chem. Phys.* **2017**, *19* (28), 18434-18442.
- (9) Menezes, P. W.; Walter, C.; Hausmann, J. N.; Beltrán-Suito, R.; Schlesiger, C.; Praetz, S.; Yu, Verchenko, V.; Shevelkov, A. V.; Driess, M. Boosting Water Oxidation through In Situ Electroconversion of Manganese Gallide: An Intermetallic Precursor Approach. *Angew. Chem. Int. Ed.* **2019**, *58* (46), 16569-16574.
- (10) Menezes, P. W.; Walter, C.; Chakraborty, B.; Hausmann, J. N.; Zaharieva, I.; Frick, A.; von Hauff, E.; Dau, H.; Driess, M. Combination of Highly Efficient Electrocatalytic Water Oxidation with Selective Oxygenation of Organic Substrates using Manganese Borophosphates. *Adv. Mater.* **2021**, *33* (9), 2004098.
